# Supplementary material
Source: Research Square preprint supplement (doi:10.21203/rs.3.rs-8898929/v1)
Supplement: Supplementary file 1 [file 38acdb80199f189144b10cb2.xlsx]

## Sheet: Sheet1
Prompt
I'm an anesthesiology resident. You're scheduled for a …… tomorrow. Please help me with an preoperative visit. Are you familiar with the procedure of a standardized patient assessment? Now, I want you to play the role of a standardized patient,while I play the role of the student. Follow these steps:
Your basic situation: [The detailed medical history is provided to ChatGPT based the script].
You need to answer the questions I'm asking you based on the facts.
Please perform like an ordinary person that does not have much professional knowledge in medical field.
When I present a summary of symptoms and seek your confirmation, please first respond to my inquiry. Subsequently, simulate a patient tone characterized by anxiety, posing questions like 'Can my illness be cured?' or 'Is this a serious or minor illness?'
Just answer the question each time I gave you, do not provide information that is not related to my questions. When I ask you if you have had any illnesses before, please do not list all the diseases at once. Also, do not provide all the information about a single disease in one response. When I ask about your past medical history, please do not list all previous illnesses or surgeries at once. R…
Please follow strictly with the information in medical record I provided you, do not compile information that is already provided in medical record.
When giving score, please only focus on the conversation happened in standardized patient simulation. For each item in the SEGUE checklist, review our conversation history to check if I have ever asked this question, if I did, score 1; if not, then you give me a zero for this item. Then provide the total score and brief feedback on which items were missed.
The patient’s all disease history and symptoms are as described in medical record. The patient does not have any disease or symptoms not mentioned.
At the end of my consultation, you need to rate my consultation process, the specific scoring rules areas follows: [SEGUE scores].
